# Supplementary material
Source: ML conference proceedings conference paper supplement (https://openaccess.thecvf.com/content/WACV2022/html/Bauer_SporeAgent_Reinforced_Scene-Level_WACV_2022_paper.html)
Supplement: Supplementary file 1 [file Bauer_SporeAgent_Reinforced_Scene-Level_WACV_2022_supplemental.pdf]

# SporeAgent: Reinforced Scene-level Plausibility for Object Pose Refinement

## Supplementary Material

Dominik Bauer<sup>1</sup>, Timothy Patten<sup>1,2</sup> and Markus Vincze<sup>1</sup>  
<sup>1</sup>TU Wien      <sup>2</sup>University of Technology Sydney  
Vienna, Austria      Sydney, Australia  
{bauer,patten,vincze}@acin.tuwien.ac.at

Illustrative visualizations of key parts of our method are shown in Section 1, including a step-wise example showing the corresponding pose scoring. Extending upon the results in the main text, we provide further ablations with respect to convergence, initialization error and segmentation quality in Section 2. Additionally, a formal definition of the used evaluation metrics is given in Section 3.

### 1. Additional Visualizations

The following visualizations aim to illustrate key concepts of SporeAgent by qualitative examples.

#### 1.1. Visualizing the Scene Representation

Figure 1 shows the target point clouds for a frame in YCB-VIDEO (YCBV) [2] in the scene representation. Critical points for a queried object (the coffee can, shown in gray) are indicated. Under initial poses (left), the object would intersect with the plane and a neighboring object (shown red). The supported points (cyan) would span a supporting polygon sufficient for static stability. But we define feasibility, i.e., non-intersecting and non-floating, as a pre-condition for plausibility, and hence the object pose is considered implausible under its current pose with the scene. The remaining objects in the scene are processed analogously.

After refinement using SporeAgent (Figure 1 right), these implausibilities are resolved. Objects are resting on the supporting plane and no longer intersect (subject to slack parameter  $\varepsilon$ ). Contacts (green) of the queried object with the object resting on-top of it are considered non-supported, since the surface normals of the neighboring object near the contacts are pointing in gravity direction.

#### 1.2. Visualizing the Pose Scoring

The scoring of pose estimates with respect to the observed frame is illustrated in Figure 2. The estimates are visualized by outlines (blue) and the corresponding per-pixel score as a heatmap. For the observation, the depth and normal image are shown (right).

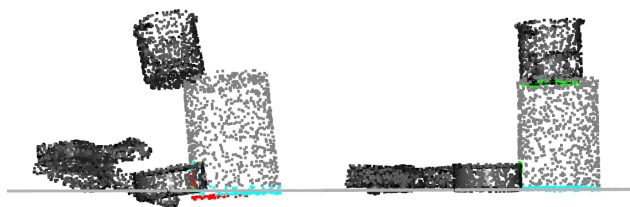

Figure 1. Initial scene representation (left) and refined poses (right). Critical points for one target object (gray) are shown – intersecting (red), contact (green) and supported (cyan).

As seen in the left-most column in Figure 2, only the initial pose estimate for the sugar box (yellow, front) results in close alignment, indicated by a warm color in the heatmap. Already within the first steps of refinement using SporeAgent, alignment is significantly increased. The best poses after the full refinement result in an even finer alignment, also resolving the large initial pose errors for the drillier and the clamp (top right in the frame).

#### 1.3. Canonical Object Frame

As shown in the main results, representing the target objects in a canonical frame and considering their symmetries significantly improves accuracy on YCBV. We propose to align symmetry axes as to simplify the annotation of geometric symmetries, as illustrated in Figure 3.

By centering the axes, the different symmetrical poses of an object reduce to rotations. This, in addition, allows to define the expert policy for a given estimate as resolving the smallest rotation error with respect to one of these rotations.

#### 1.4. Visualizing the Segmentation Augmentation

The augmentation of the instance segmentation during training is visualized in Figure 4. The foreground (blue) and background (purple) are determined using the ground-truth visibility mask, with the background restricted to the bounding box around the mask. Both regions are pre-

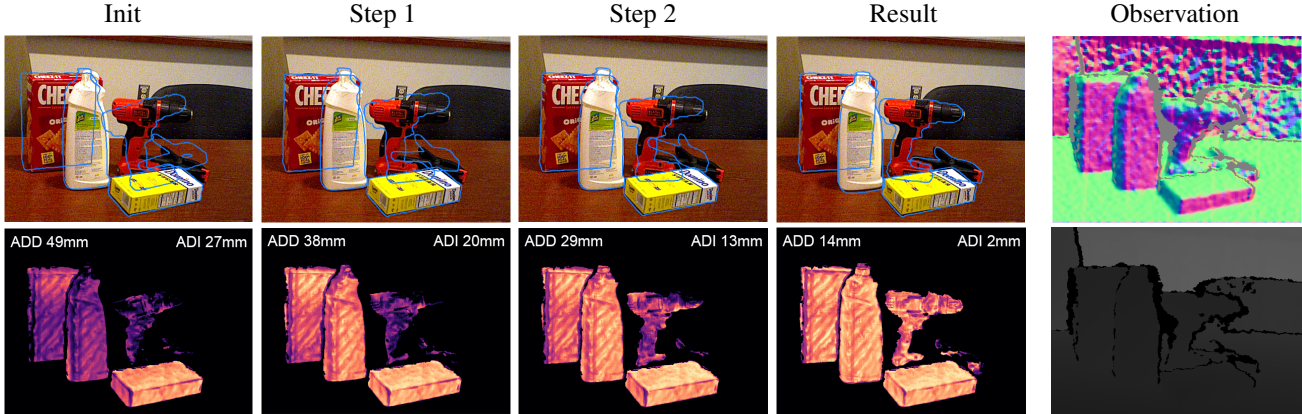

Figure 2. Qualitative step-by-step example with (from left to right) initialization, first two steps and the final result after 10 iterations. The inputs – the observed normal and depth image – are shown in the last column. In the corresponding error images used for scoring (bottom row) a warmer color indicates a higher alignment between estimate and observation. ADD/ADI are the mean over per-object distances.

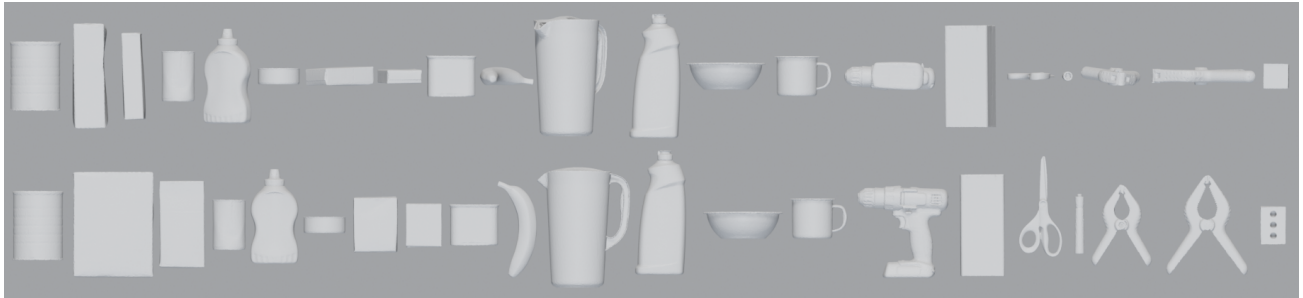

Figure 3. YCB-VIDEO objects in default (top) and our canonical frame (bottom). Objects without a rotational symmetry (banana, pitcher, bleach, mug, driller, scissors) are aligned with respect to their mirror-symmetry plane.

sampled to an equal number of points. Per sample, the augmentation randomly selects one of the foreground pixels (cross) and determines its nearest neighbors in image space. Depending on a uniformly-random fraction  $p$  and a total number of points to sample  $n$ , the  $\lceil pn \rceil$  nearest neighbors in the foreground and  $\lfloor (1-p)n \rfloor$  nearest neighbors in the background are sampled. This results in a coherent foreground patch, simulating occlusion or a too small mask for  $p < 1$ . The background patch will consist of a part that is coherent with the foreground patch (too large mask, bleeding-out into the surrounding of the object) and a part that fades farther into the surrounding (outliers). As shown in the experiments on YCBV, where training and test scenes are different, this approach allows to learn which points to ignore rather than learning specific scene surroundings.

## 2. Additional Experiments

Given that we use Reinforcement Learning (RL) and several data augmentations that depend on random values, the training of SporeAgent is dependent on the random seed value. During inference, the performance of our method is moreover affected by the number of refinement iterations and the pose initialization.

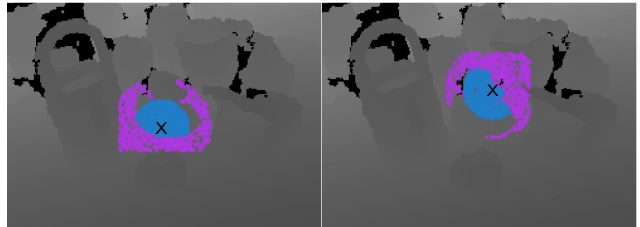

Figure 4. Segmentation augmentation during training with  $p = 50\%$  foreground samples. Selected center (cross), sampled foreground (blue) and sampled background (purple). Background samples are limited to a bounding box around the target object.

### 2.1. Convergence with Varying Random Seed

Figure 5 shows the training convergence of SporeAgent on the LINEMOD (LM) [1] dataset for 5 different random seeds. The reported AD recalls are obtained by evaluation on the test set using the current weights after the corresponding training epoch. After 50 epochs, the final performance for the  $0.10d$  threshold is already achieved and the recall is within 1% for the  $0.05d$  threshold. The standard deviation for the last epoch is 0.02, 0.2 and 0.3% for the  $0.10$ ,  $0.05$  and  $0.02d$  threshold, respectively.

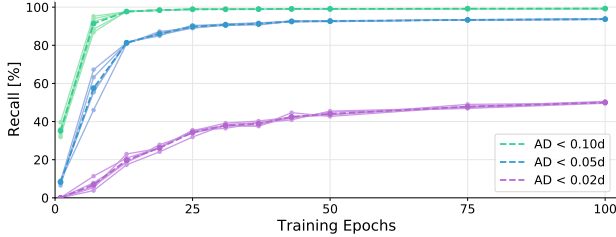

Figure 5. Convergence of the mean recall per epoch (dashed) and LINEMOD for 5 random seeds (solid). Best viewed digitally.

|                | ADD AUC ( $\uparrow$ ) | AD AUC ( $\uparrow$ ) | ADI AUC ( $\uparrow$ ) |
|----------------|------------------------|-----------------------|------------------------|
| init (PoseCNN) | 51.5                   | 61.3                  | 75.2                   |
| 1 iteration    | 64.4                   | 74.6                  | 84.5                   |
| 2              | 71.0                   | 81.0                  | 88.5                   |
| Multi-ICP* [2] | 77.4                   | 86.6                  | 92.6                   |
| 5              | 77.9                   | 87.6                  | 92.9                   |
| 10             | 79.0                   | 88.8                  | 93.6                   |

Table 1. Influence of number of iterations on results of SporeAgent on YCB-VIDEO. The results of PoseCNN (our initialization) and the ICP-based multi-hypothesis approach in [2] are shown (gray).

## 2.2. Number of Refinement Iterations

As indicated in Table 1, SporeAgent significantly improves the pose accuracy within the first few iterations. The learned policy quickly resolves large displacements by selection of the highest magnitude step size. This is also illustrated by the ablation over initial translation errors in Figure 6 (right). Later iterations further improve alignment, as shown in Figure 5. Depending on the downstream task, accuracy and the number of iterations may be balanced.

## 2.3. Influence of Initial Pose

To evaluate robustness to the initialization, we apply a random error of varying magnitude on-top of the ground-truth pose. Rotation and translation errors are evaluated separately with the other kept constant at  $10deg$  and  $0.1$  units (normalized space), respectively. The random errors are generated as for the training augmentation. A unit vector is randomly and uniformly sampled and interpreted as rotation axis or translation direction. The corresponding rotation angle or translation distance are randomly uniform.

The AD recalls for varying initial errors are shown in Figure 6. The results highlight the robustness of SporeAgent to translation errors. We conjecture that the normalized representation, with a centered target point cloud, simplifies the correction of solely translational offsets. Towards an error of 3 units in this normalized space, the largest step size of  $0.27$  (in combination with at most 10 iterations) becomes a limiting factor. Rotation errors affect performance more heavily as a partial source may be rotated to align with similar regions of the target point cloud. Yet, up to about  $30deg$ , the recall for a threshold of  $0.10d$  is barely affected and at  $45deg$  is still above  $90\%$ .

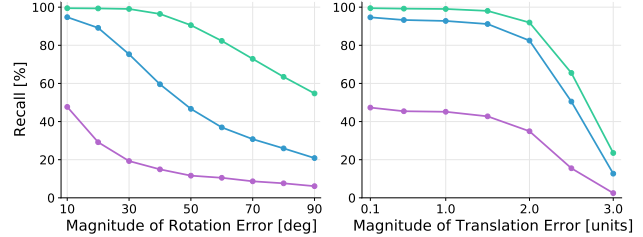

Figure 6. AD recalls on LINEMOD for varying pose initialization error in rotation (left) and translation (right).

## 3. Definition of Metrics

Hinterstoisser et al. [1] propose two metrics for the evaluation of estimated object poses of a given 3D model. The Average Distance of Model Points (ADD) is defined as the mean distance between corresponding model points  $m \in M$  under estimated pose  $\hat{T}$  and under ground-truth pose  $T$ . To deal with symmetrical objects, the Average Distance of Model Points with Indistinguishable Views (ADI) computes the mean distance between the nearest neighbors under either pose. Formally, the metrics are defined as

$$\begin{aligned}
 ADD &= \frac{1}{|M|} \sum_{m \in M} \|\hat{T}m - Tm\|_2, \\
 ADI &= \frac{1}{|M|} \sum_{m_1 \in M} \min_{m_2 \in M} \|\hat{T}m_1 - Tm_2\|_2.
 \end{aligned} \tag{1}$$

Additionally, we abbreviate a mixed usage of both metrics with  $AD$ . For  $AD$ , objects considered symmetrical are evaluated using the ADI metric and using ADD otherwise.

These metrics are computed for all  $N$  test samples and the recall for a given precision threshold  $th$  is defined as

$$AD_{th} = \frac{1}{N} \sum_{i=1}^N \begin{cases} 0, & AD_i > th \\ 1, & AD_i \leq th. \end{cases} \tag{2}$$

For the *Area Under the precision-recall Curve* (AUC),  $th$  is varied within a range of precision thresholds and the area under resulting curve of recall values is reported.

## References

- [1] Stefan Hinterstoisser, Vincent Lepetit, Slobodan Ilic, Stefan Holzer, Gary Bradski, Kurt Konolige, and Nassir Navab. Model based training, detection and pose estimation of texture-less 3d objects in heavily cluttered scenes. In *ACCV*, pages 548–562, 2012.
- [2] Yu Xiang, Tanner Schmidt, Venkatraman Narayanan, and Dieter Fox. Posecnn: A convolutional neural network for 6d object pose estimation in cluttered scenes. In *Robot.: Sci. Syst.*, 2018.
